# Supplementary material
Source: publisher figshare collection journal article supplement (https://acs.figshare.com/ndownloader/files/4630228)
Supplement: Supplementary file 1 [file 4630228]

Supporting Information

for

**Spermine-Induced Hybridisation and Charge Inversion at the Diffuse Layer of a  
DNA-FET**

Roberto de la Rica\*, César Fernández-Sánchez, Cecilia Jiménez-Jorquera, Antonio Baldi

Departamento de Micro- y Nanosistemas, Instituto de Microelectrónica de Barcelona

(CNM-IMB, CSIC), Campus UAB 08193 Bellaterra, Barcelona

\*roberto.delarica@gmail.com

### **Field-effect transistor fabrication and instrumentation.**

Starting silicon wafers had 0.8-1.4  $\text{ohm}\cdot\text{cm}$  resistivity. A 0.4  $\mu\text{m}$ -thick oxide was thermally grown and patterned to open the source and drain areas. The FET channel is, as defined in the photolithography mask, 5  $\mu\text{m}$  long and 500  $\mu\text{m}$  wide. Phosphor-doped n-type regions were formed by ion implantation. A second patterning of the oxide layer was used to remove the thick oxide from the gate area. Subsequently, a 10 nm oxide layer was grown in  $\text{O}_2$  atmosphere at 800  $^\circ\text{C}$  and a 15 nm nitride layer was deposited by LPCVD (Low Pressure Chemical Vapour Deposition). The fabrication was finished with the dry-etch opening of contact areas, deposition of a 0.5  $\mu\text{m}$  aluminum layer and its wet-etch patterning. After wafer dicing, the chips were glued and wire-bonded to a printed circuit board (PCB). Encapsulation was performed by covering the PCB and the chip with a photocurable epoxy resin (Ebecryl 600, UCB Chemicals) and exposing it to UV light through a mask. The uncured polymer on top of the FET gate was removed with ethanol.

A two channel home-made amplifier was used to measure simultaneously the C and NC modified FETs as well as the differential signal. The amplifier keeps the drain current and drain to source voltage constant at 100  $\mu\text{A}$  and 0.5 V, correspondingly. The amplifier output voltage is the voltage drop from the reference electrode to the source terminal. A double junction Ag/AgCl reference electrode was used. The outer solution was filled up with hybridisation buffer, in order to avoid diffusion of ions from the electrode to the solution. A KUSB3116 data acquisition module and a LabView program in a PC were used to record and store the output signals.

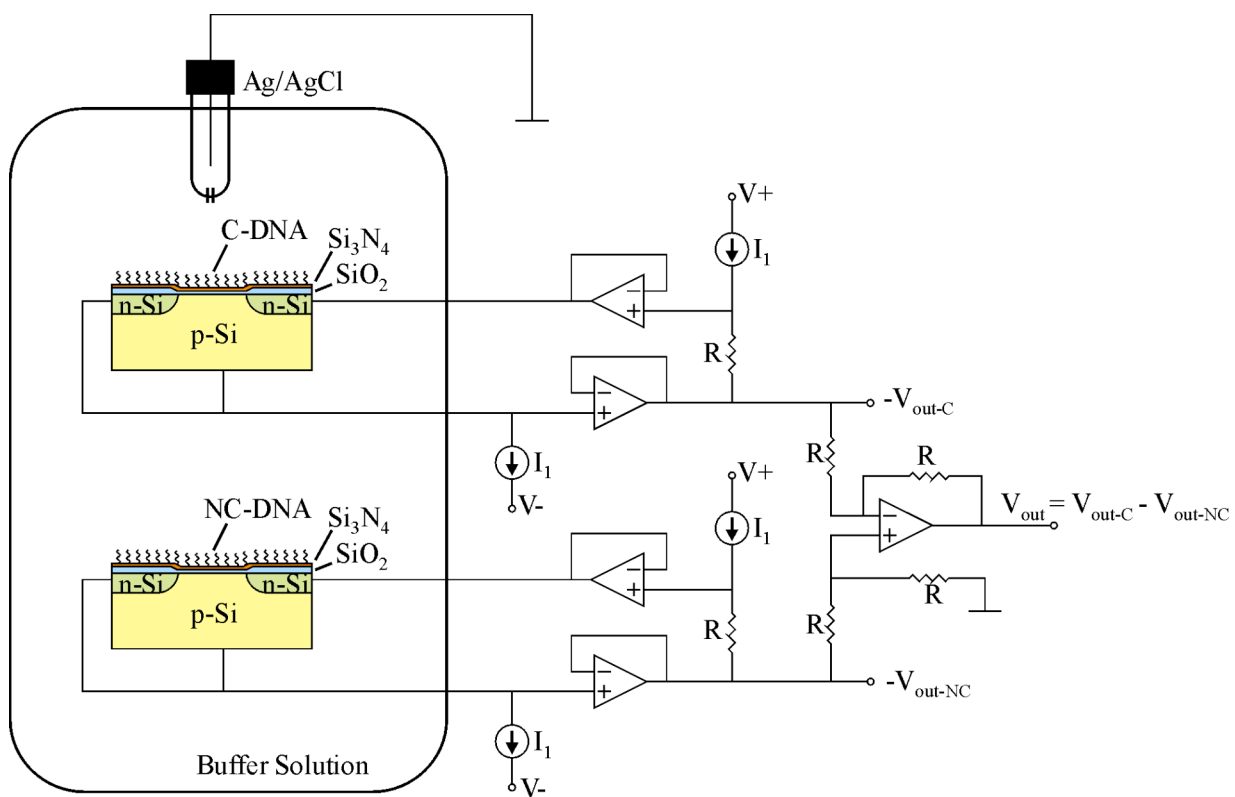

**Figure S1.** FET cross-section and electrical measurement set-up.
